# Supplementary material for: Timed daily exercise remodels circadian rhythms in mice
Source: PubMed Central journal article supplement (PMC8213798; doi:10.1038/s42003-021-02239-2), 2021-06-18
Supplement: 42003_2021_2239_MOESM3_ESM.pdf [file 42003_2021_2239_MOESM3_ESM.pdf]

## **Description of Additional Supplementary Files**

**File name:** Supplementary Data 1

**Description:** Summary data for main figures 1-7.
